# Supplementary material for: Knowledge-based development of a nitrate-free synthesis route for Cu/ZnO methanol synthesis catalysts via formate precursors
Source: Royal Society of Chemistry journal article supplement (doi:10.1039/c0cc04933f), 2011-01-01
Supplement: c0cc04933f.pdf [file c0cc04933f.pdf]

## Electronic Supplementary Information (ESI)

### Knowledge-based development of a nitrate-free synthesis route for Cu/ZnO methanol synthesis catalysts via formate precursors

by

Malte Behrens, Stefan Kießner, Frank Girsgdies, Igor Kasatkin, Felix Hermerschmidt, Katharina Mette, Holger Ruland, Martin Muhler, and Robert Schlögl

#### Experimental Details

##### Characterization

*XRD*: The samples were measured on a STOE STADI P transmission diffractometer equipped with a primary focusing Ge monochromator (Cu  $K\alpha_1$  radiation) and a linear position sensitive detector (moving mode, step size  $0.1^\circ$ , counting time 10 s/step, resolution  $0.01^\circ$ , total accumulation time 634 s). The samples were mounted in the form of a clamped sandwich of small amounts of powder fixed with a small amount of grease between two layers of thin polyacetate film.

*Rietveld refinement*: Refinements were done in the  $2\theta$  range  $5\text{--}80^\circ$  using the software package TOPAS [S1]. The background was modelled using a third order Chebychev polynomial. Some technical details are listed in the following table.

| Zn content x       | 0       | 0.04    | 0.10    | 0.15    | 0.21    |
|--------------------|---------|---------|---------|---------|---------|
| $R_{exp}^a$        | 0.0674  | 0.0666  | 0.0660  | 0.0700  | 0.0693  |
| $R_{wp}^a$         | 0.1000  | 0.0942  | 0.0993  | 0.0936  | 0.0799  |
| $R_p^a$            | 0.0718  | 0.0682  | 0.0713  | 0.0672  | 0.0586  |
| $R_{exp}'^a$       | 0.1080  | 0.1101  | 0.1016  | 0.1271  | 0.1435  |
| $R_{wp}'^a$        | 0.1601  | 0.1556  | 0.1528  | 0.1701  | 0.1655  |
| $R_p}'^a$          | 0.1446  | 0.1414  | 0.1319  | 0.1577  | 0.1602  |
| GOF                | 1.48    | 1.41    | 1.50    | 1.34    | 1.15    |
| $R_{Bragg}$        | 0.04035 | 0.02689 | 0.02376 | 0.02773 | 0.02006 |
| No. of reflections | 160     | 160     | 159     | 161     | 164     |
| No. of parameters  | 32      | 32      | 32      | 32      | 32      |
| FHI database ID#   | 8141    | 8000    | 7975    | 8639    | 8059    |

<sup>a</sup> Primed  $R$  values are background corrected; definition of the  $R$  values according to [S2].

*Electron microscopy:* SEM images were taken in a Hitachi S-4800 (FEG) system. HRTEM images were taken on a Philips CM200FEG microscope operated at 200 kV. The coefficient of spherical aberration was  $C_s = 1.35$  mm. The information limit was better than 0.18 nm allowing the principal phases to be identified in HRTEM images. High-resolution images with a pixel size of 0.016 nm were taken at the magnification of 1083000 $\times$  with a CCD camera.

*Elemental analysis:* Cu to Zn ratios of the samples were obtained by X-ray fluorescence (XRF) measurements. The samples were glassed with  $\text{Li}_2\text{B}_4\text{O}_7$  and analyzed in a Bruker S4 Pioneer X-ray spectrometer.

## Synthesis

### *Materials*

ZnO (>99.99%) and  $\text{Cu}_2(\text{OH})_2\text{CO}_3$  (p.a.) were obtained from Aldrich,  $\text{Na}_2\text{CO}_3$  (>99.9%), and formic acid (85%, p.a.) from Roth, and NaOH (p.a.) from Riedel de Häen.

### *Highly crystalline model precursors:*

In course of the preparation, constant pH co-precipitation was performed in an automated laboratory reactor (Mettler-Toledo Labmax, 2 L, prefilled with 400 mL water) at  $T = 65$  °C and pH 5.5 from aqueous 1.6 M  $\text{Na}_2\text{CO}_3$  solution and aqueous 0.5 M Cu,Zn solution. The latter was prepared by dissolving appropriate amounts of  $\text{Cu}_2(\text{OH})_2\text{CO}_3$  and ZnO in a solution of conc. formic acid (85 %) and water. Solidification of the metal ions was incomplete and the analytical Cu:Zn ratios determined by XRF (100:0, 96:4, 90:10, 85:15 and 78:22) were always higher than the nominal ones (100:0, 75:25, 50:50, 35:65, 25:75). The precipitate was thoroughly washed with water and finally dried at 60 °C for 16 hours. Calcination was performed in a flow of pure  $\text{O}_2$  at 200 °C for 3 hours (heating rate: 2 Kpm). Temperature programmed reduction to activate the catalyst took place in TPDRO 1100 instrument at 200°C for 3 hours (heating rate: 1 Kpm) in 5%  $\text{H}_2/\text{Ar}$ .

### *Catalyst precursors:*

The preparation matches the method described above for the highly crystalline model precursors, but applying  $T = 25$  °C, pH = 7 and NaOH instead of  $\text{Na}_2\text{CO}_3$ . The increase in pH leads to a more complete precipitation and the deviation between nominal and analytical Cu:Zn ratio was could be significantly lowered (75:25 vs. 81:19).

### *Anion composition:*

While the Cu:Zn ratio of the precursors has been determined by XRF, the anionic composition of a  $\text{Cu}_2(\text{OH})_3\text{HCO}_2$  sample was investigated by IR spectroscopy as

described in reference [13] of the main text. The results confirmed the presence of OH-groups and formate ( $1579\text{ cm}^{-1}$ ), while carbonate was absent. The overall cation-to-anion ratio was checked by TGA. The mass loss at  $500\text{ }^{\circ}\text{C}$  in air is 28.9% in very good agreement with the theoretical mass loss of 28.7% if CuO is assumed as the only decomposition product.

#### *Catalytic testing / Cu surface area determination*

Catalytic testing was performed in a flow set-up equivalent to that described in ref. [S3]. For fast on-line gas analysis, a calibrated quadrupole mass spectrometer (Pfeiffer Vacuum, Thermostar) was used. The following gases of high purity were used: He (99.9999 %),  $\text{H}_2$  (99.9999 %),  $\text{N}_2\text{O}/\text{He}$  (1%  $\text{N}_2\text{O}$ , 99.9995 %),  $\text{H}_2/\text{He}$  (2.0 %  $\text{H}_2$ , 99.9999%) and a mixture of 72%  $\text{H}_2$ , 10%  $\text{CO}$ , 4%  $\text{CO}_2$  in He used as methanol synthesis feed gas (99.9995 %). A glass-lined stainless steel microreactor was filled with 100 mg catalyst (sieve fraction 250-355  $\mu\text{m}$ ). The catalyst was reduced by heating to  $175\text{ }^{\circ}\text{C}$  ( $1\text{ K min}^{-1}$ ) in a gas mixture of 2.0 %  $\text{H}_2/\text{He}$  and subsequently in 100%  $\text{H}_2$  to  $240\text{ }^{\circ}\text{C}$ . The catalytic activity under steady-state conditions was determined at  $220\text{ }^{\circ}\text{C}$  and at 10 bar pressure, using a flow rate of  $50\text{ N ml min}^{-1}$ . The copper surface area was determined applying  $\text{N}_2\text{O}$  reactive frontal chromatography according to the method proposed by Chinchén et al. [S4] at somewhat more moderate reaction conditions [S3]. The catalytic test was performed at  $220\text{ }^{\circ}\text{C}$  and 10 bar pressure.

## **Results**

### *XRD refinements*

The monoclinic basic copper nitrate  $\text{Cu}_2(\text{OH})_3\text{NO}_3$  is a well-known compound and the crystal structure was originally described in the space group  $P2_1/m$  [S5]. Later works conclusively proved the symmetry to be  $P2_1$  [S6,S7]. However, the lower symmetry is caused mainly by the position of the terminal oxygen atoms of the nitrate ligand and the hydrogen atoms, while the majority of the structure is pseudo-symmetric. For the sake of a more stable Rietveld refinement, we thus decided to derive a structure model for  $(\text{Cu}_{1-x}\text{Zn}_x)_2(\text{OH})_3\text{HCO}_2$  from the corresponding nitrate structure in  $P2_1/m$  [S5] replacing the symmetric  $-\text{NO}_2$  residue with a disordered  $-\text{C}=\text{O}$  group (hydrogen positions were not considered). It turned out that besides the terminal oxygen atom also the carbon atom of the formate group has to be described with a statistically occupied split position. The final model is thus analogous to the structure of the nitrite derivative  $\text{Cu}_2(\text{OH})_3\text{NO}_2$  [S8]. Finally, we should mention that a single crystal investigation on  $\text{Cu}_2(\text{OH})_3\text{HCO}_2$  has been published during the work on this paper [S9] indicating that the true symmetry of  $\text{Cu}_2(\text{OH})_3\text{HCO}_2$  (and thus the zinc substituted series) is most probably  $P2_1$  in analogy to the monoclinic nitrate.

Table of refined lattice parameters of  $(\text{Cu}_{1-x}\text{Zn}_x)_2(\text{OH})_3\text{HCO}_2$ , space group  $P2_1/m$

| $x$              | 0            | 0.04         | 0.10         | 0.15        | 0.21        |
|------------------|--------------|--------------|--------------|-------------|-------------|
| $a / \text{Å}$   | 5.59522(9)   | 5.58401(12)  | 5.56789(13)  | 5.55317(15) | 5.53641(16) |
| $b / \text{Å}$   | 6.06594(9)   | 6.08624(12)  | 6.11275(14)  | 6.14171(16) | 6.17023(17) |
| $c / \text{Å}$   | 6.94190(14)  | 6.94037(19)  | 6.9407(2)    | 6.9414(3)   | 6.9444(3)   |
| $\beta / ^\circ$ | 105.8484(13) | 105.3705(17) | 104.7695(19) | 104.133(2)  | 103.5526    |
| $V / \text{Å}^3$ | 226.654(7)   | 227.436(9)   | 228.421(10)  | 229.576(12) | 230.619(12) |

Graphical representation of Rietveld fit

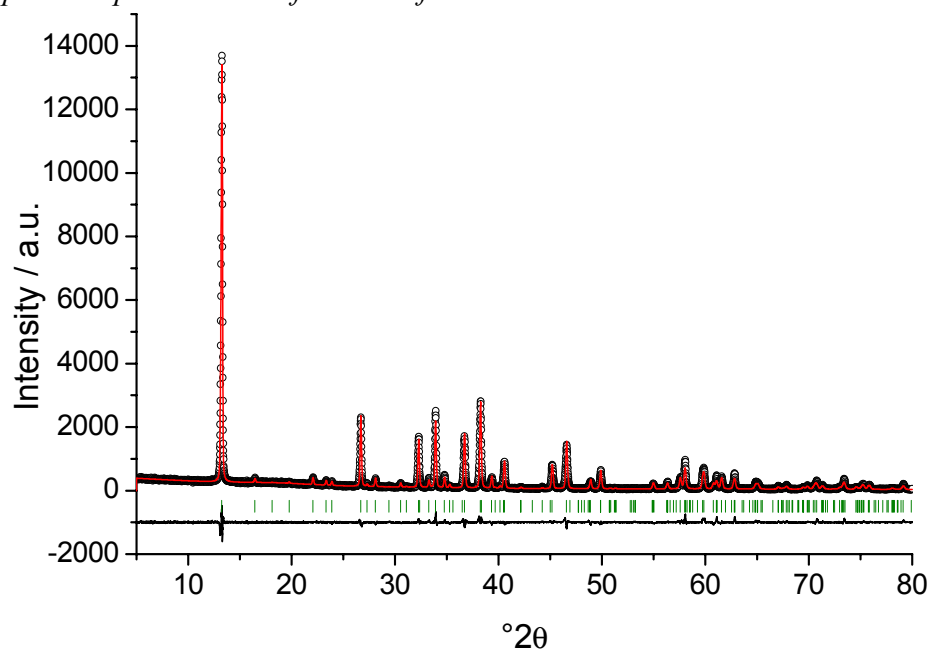

**Figure S1:** Rietveld fit of the highly crystalline model precursor  $x = 0$  (data points: experimental data; red line: theoretical pattern; green tick marks: position of Bragg reflections; black line: difference curve). The quality of this fit is representative for all refinements.

*XRD patterns as a function of Zn-content*

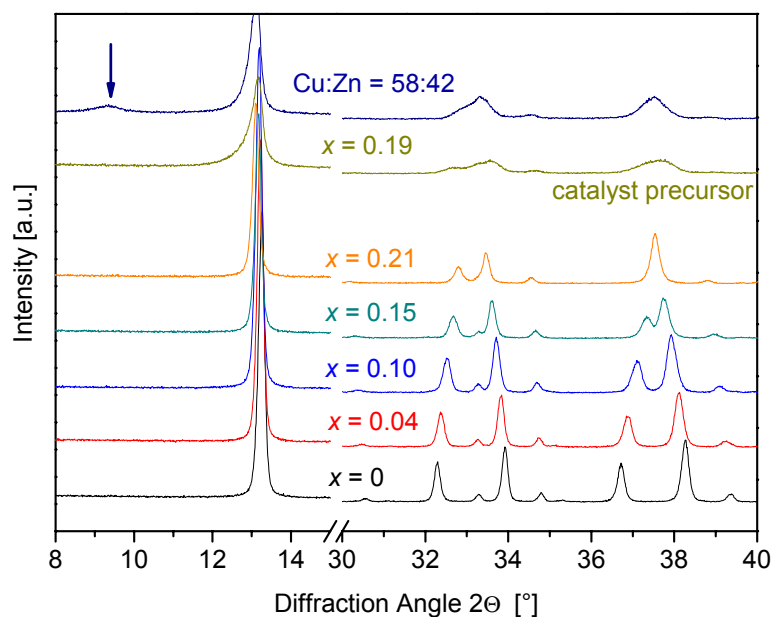

**Figure S2:** XRD of formate precursors with different Cu:Zn ratios showing systematic shifts in the peak positions and the appearance of an unidentified by-phase (arrow) for Zn contents  $> 0.21$

*XRD of calcined sample  $(\text{Cu}_{0.79}\text{Zn}_{0.21})_2(\text{OH})_3\text{HCO}_2$*

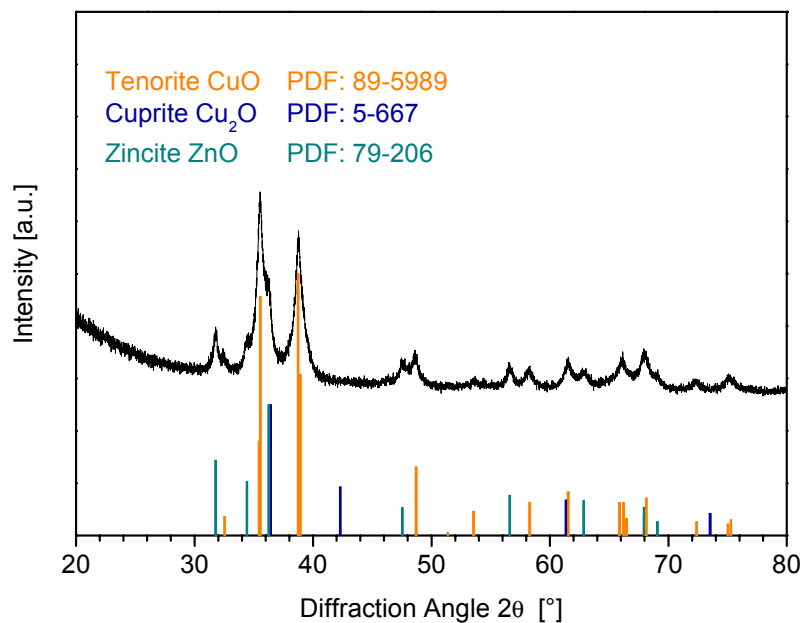

**Figure S3:** XRD shows the presence of CuO and ZnO after thermal decomposition in  $\text{O}_2$  (black line: experimental data; orange columns: tenorite; blue columns: cuprite; turquoise columns: zincite; FHI database ID #8176)

*TEM investigations*

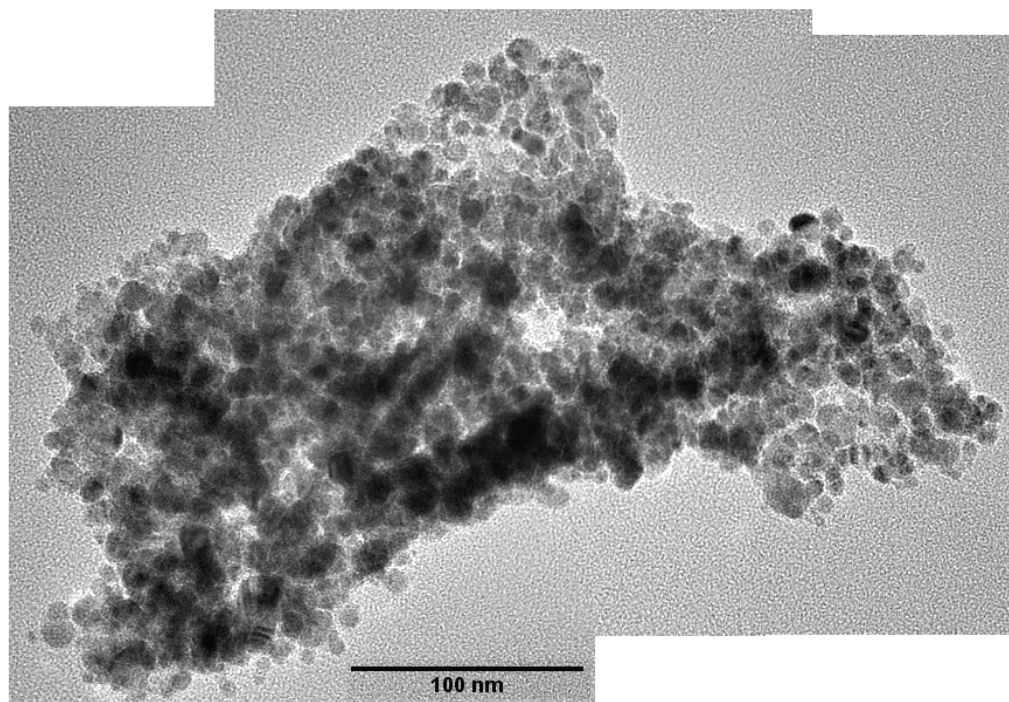

**Figure S4:** Low resolution image of a nanoparticulate Cu/ZnO aggregate obtained after calcination and reduction of a  $(\text{Cu}_{0.81}\text{Zn}_{0.19})_2(\text{OH})_3\text{HCO}_2$  catalyst precursor

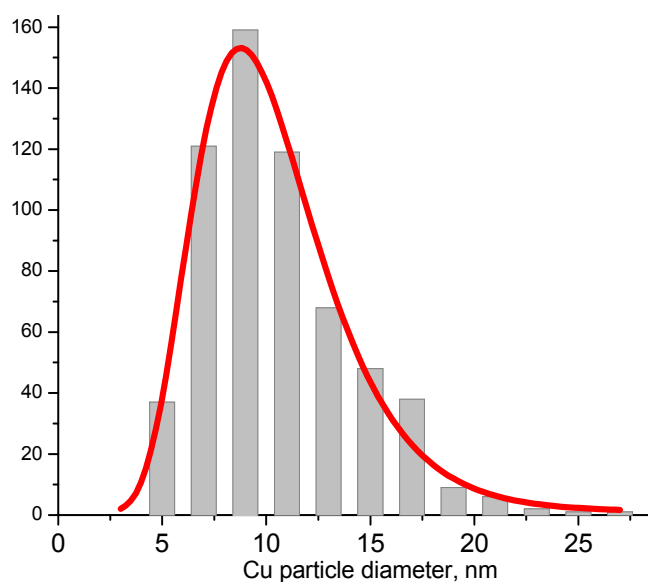

**Figure S5:** Corresponding Cu particle size distribution determined by TEM based on 609 particles. Mean diameter is 10.5 nm (standard deviation: 3.6 nm, standard error:  $\pm 0.1$  nm, distribution skewness: 0.95, distribution kurtosis: 1.05). The mean volume weighted diameter is 11.7 nm;

## References

- [S1] A. A. Coelho, *Topas, General Profile and Structure Analysis Software for Powder Diffraction Data*, Version 3.0, Bruker AXS GmbH, Karlsruhe, Germany, **2006**.
- [S2] R. A. Young in *The Rietveld Method*, ed. R.A. Young, Oxford University Press **1993**, 1 ff.
- [S3] O. Hinrichsen, T. Genger, M. Muhler, *Chem. Eng. Technol.* **2000**, 23, 956-959.
- [S4] G. C. Chinchén, C. M. Hay, H. D. Vanderwell, K. C. Waugh, *J. Catal.* **1987**, 103, 79.
- [S5] N. Nowacki, R. Scheidegger, *Helv. Chim. Acta* 1952, **35**, 375.
- [S6] H. Effenberger, *Z. Kristallogr.* 1983, **165**, 127.
- [S7] N. Guillou, M. Louër, D. Louër, *J. Solid State Chem.* 1994, **109**, 307.
- [S8] M Schmidt, H. Möller, H. D. Lutz, *Z. Anorg. Allgem. Chem.* 1993, **619**, 1287.
- [S9] H. Euler, B. Barbier, A. Kirfel, S. Haseloff, G. Eggert, *Z. Kristallogr.* 2009, **224**, 609.
